# Supplementary material for: Development of a High Throughput Screen for the Identification of Inhibitors of Peptidoglycan O-Acetyltransferases, New Potential Antibacterial Targets
Source: MDPI journal article supplement (doi:10.3390/antibiotics8020065), 2019-05-27
Supplement: s1 [file s1]

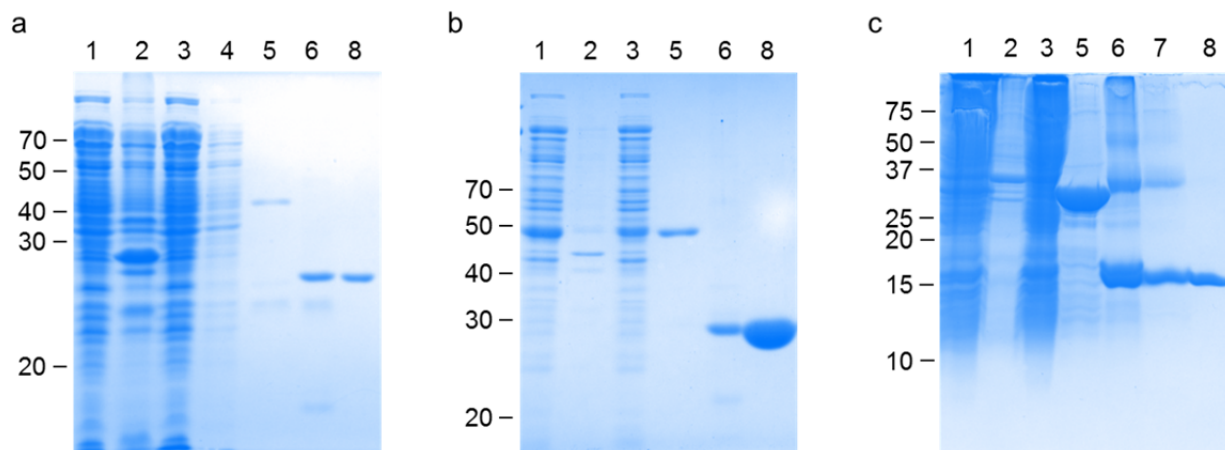

**Figure S1.** SDS PAGE analysis of the purification of (a) *NgPatB* $_{\Delta 69}$ , (b) *NgPatB* $_{\Delta 100}$ , and (c) *SaOatA* $_{\Delta 445}$ . Lanes: 1, clarified soluble lysate; 2, insoluble lysate; 3, flow through after incubation with  $\text{Ni}^{2+}$  affinity resin; 4, wash fraction of  $\text{Ni}^{2+}$  affinity resin with 10 mM wash buffer; 5,  $\text{Ni}^{2+}$  affinity resin elution fraction; 6, elution following SUMO protease digestion; 7, SUMO digestion cleavage capture; and 8, final prepared sample purified by size exclusion chromatography (for *SaOatA* $_{\Delta 445}$ ), or cation-exchange chromatography (for *NgPatB* $_{\Delta 69}$  and *NgPatB* $_{\Delta 100}$ ). These purified proteins were stored for at least a month prior to the analysis presented to demonstrate their long-term stability. Note, not all fractions are present in each respective gel. Molecular weight markers (kDa) are indicated on the left.

**Table S1.** Kinetic analysis of *SaOatA* and *NgPatB* variants as *O*-acetyl esterases.<sup>1</sup>

| Substrate      | Variant                       | $K_M$ (mM)      | $k_{cat}$ ( $\text{sec}^{-1}$ ) | $k_{cat}/K_M$ ( $\text{M}^{-1}\cdot\text{sec}^{-1}$ ) |
|----------------|-------------------------------|-----------------|---------------------------------|-------------------------------------------------------|
| 4MU-Ac         | <i>NgPatB</i> $_{\Delta 69}$  | $0.49 \pm 0.1$  | $0.06 \pm 0.003$                | $122 \pm 26$                                          |
|                | <i>NgPatB</i> $_{\Delta 100}$ | $0.49 \pm 0.06$ | $0.048 \pm 0.002$               | $98.3 \pm 13$                                         |
|                | <i>SaOatA</i> $_{\Delta 445}$ | $0.11 \pm 0.01$ | $0.0047 \pm 0.00003$            | $41.8 \pm 4.4$                                        |
| <i>pNP</i> -Ac | <i>NgPatB</i> $_{\Delta 69}$  | $1.77 \pm 0.19$ | $0.14 \pm 0.006$                | $79.1 \pm 9.1$                                        |
|                | <i>NgPatB</i> $_{\Delta 100}$ | $2.96 \pm 0.07$ | $0.44 \pm 0.006$                | $214 \pm 8.0$                                         |
|                | <i>SaOatA</i> $_{\Delta 445}$ | $1.14 \pm 0.05$ | $0.047 \pm 0.0008$              | $41.2 \pm 2.0$                                        |

<sup>1</sup> The Michaelis-Menten steady-state kinetic parameters were determined for 3  $\mu\text{M}$  *NgPatB* in 50 mM sodium phosphate buffer, pH 7.0, and for 5  $\mu\text{M}$  *SaOatA* $_{\Delta 445}$  in 50 mM sodium phosphate buffer, pH 6.5 using 0.005–5 mM *pNP*-Ac, and 0.02–2 mM 4MU-Ac as substrates.  $\pm$  standard deviation ( $n=3$ ).

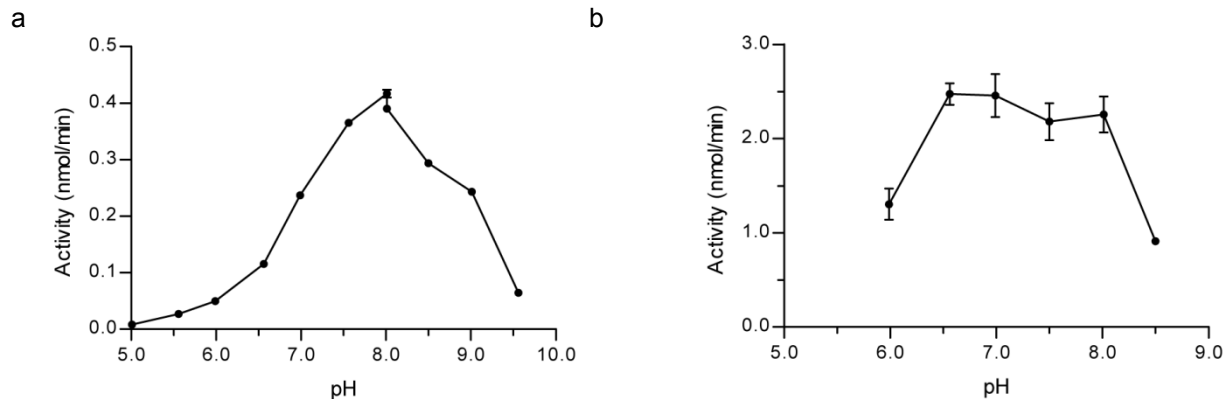

**Figure S2.** Dependence of (a) *SaOatA* $\Delta$ <sub>445</sub> and (b) *NgPatB* $\Delta$ <sub>100</sub> O-acetyltransferase activity on pH. 4MU-Ac in 50 mM tripartite buffer consisting of sodium citrate, sodium phosphate and sodium borate was used as substrate to assay the O-acetyltransferase activity of both enzymes at the pH values indicated.

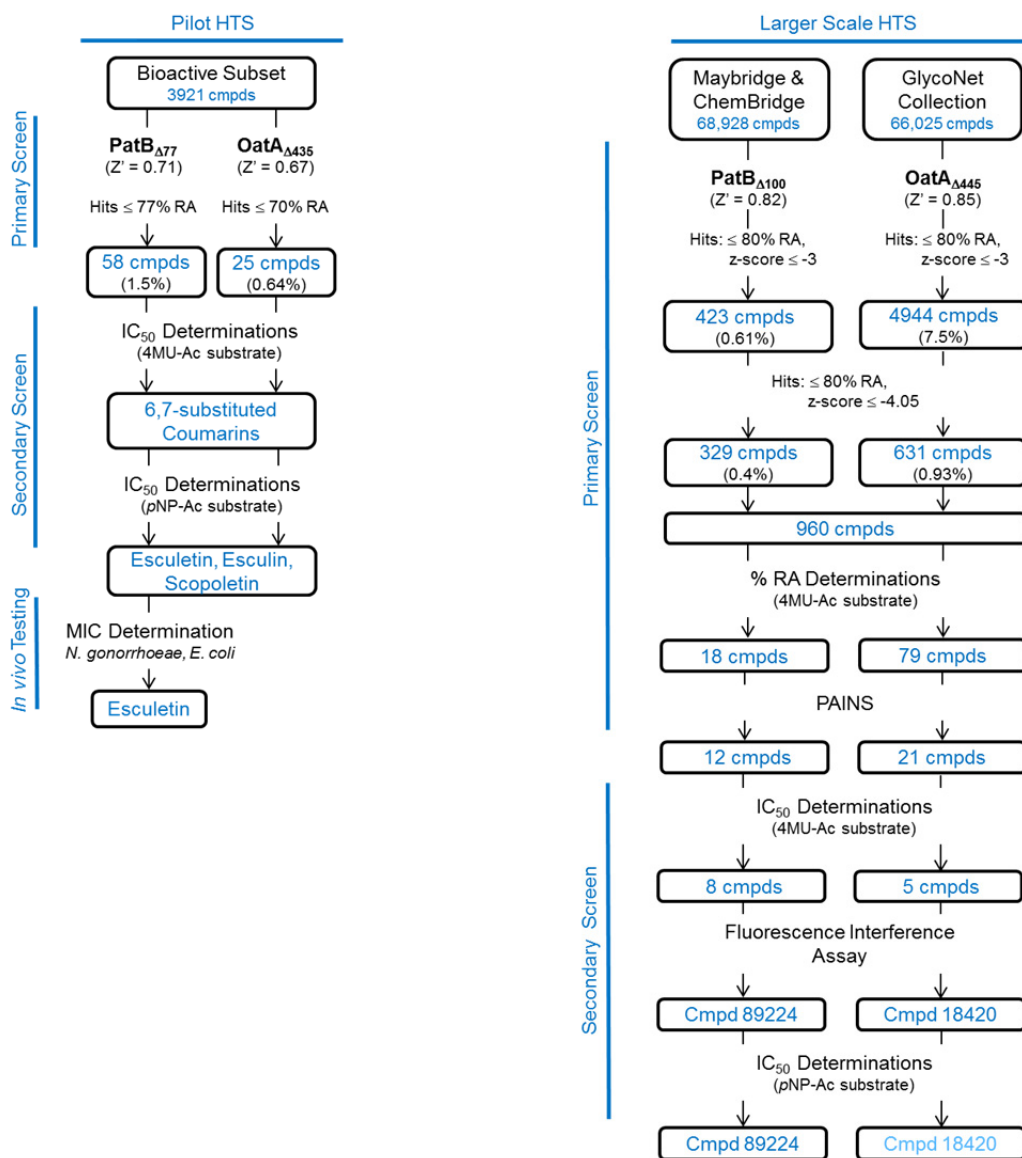

**Figure S3.** Flowcharts of pilot and larger-scale screens for inhibitors of PatA and OatA.

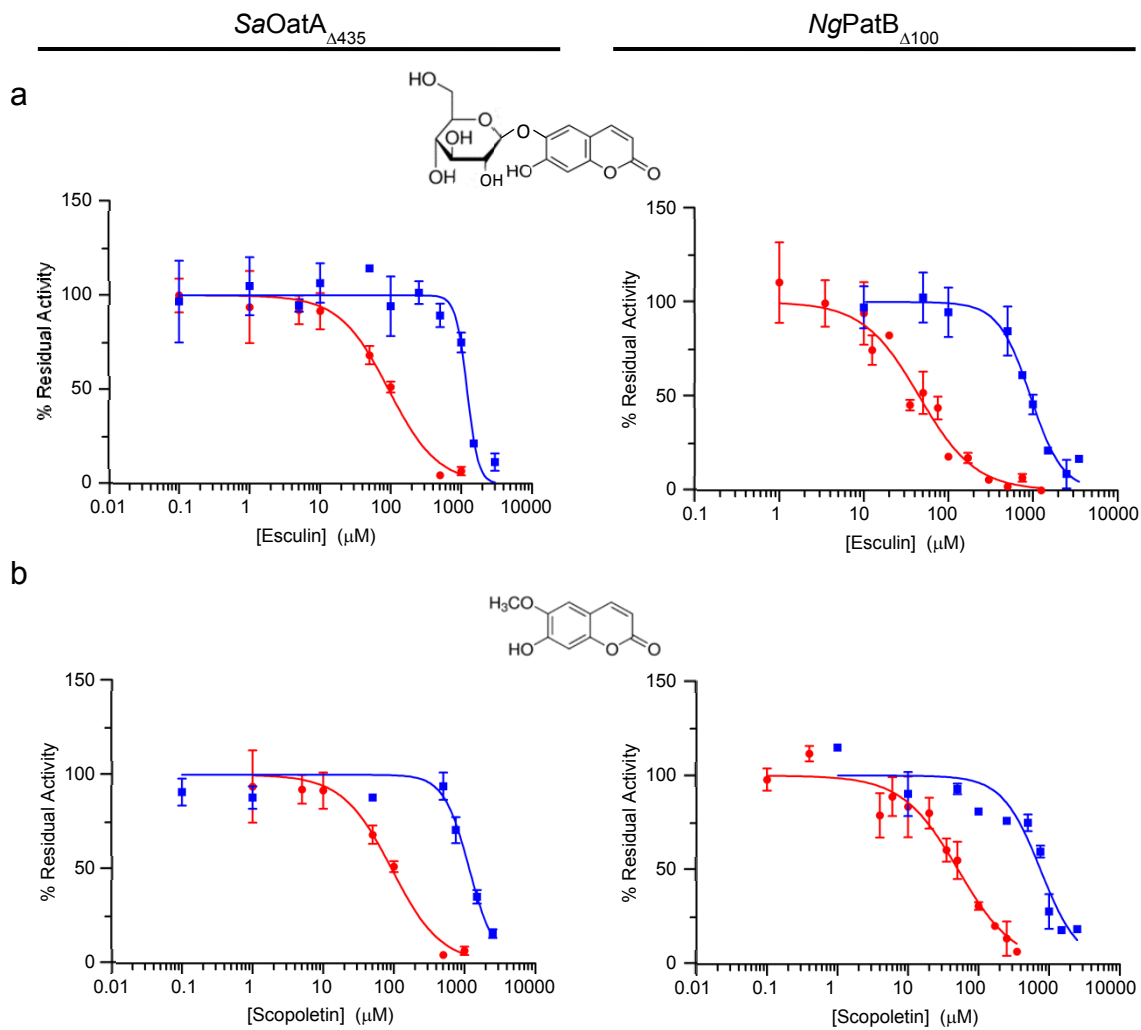

**Figure S4.** Molecular structure and half maximal inhibitory concentrations of (a) esculin and (b) scopoletin for inhibition of *SaOatA<sub>Δ435</sub>* and *NgPatB<sub>Δ69</sub>*. The dose response assays were conducted on both enzymes using 4MU-Ac (red) and *p*NP-Ac (blue) as substrates. Error bars denote standard deviations, (n = 3).

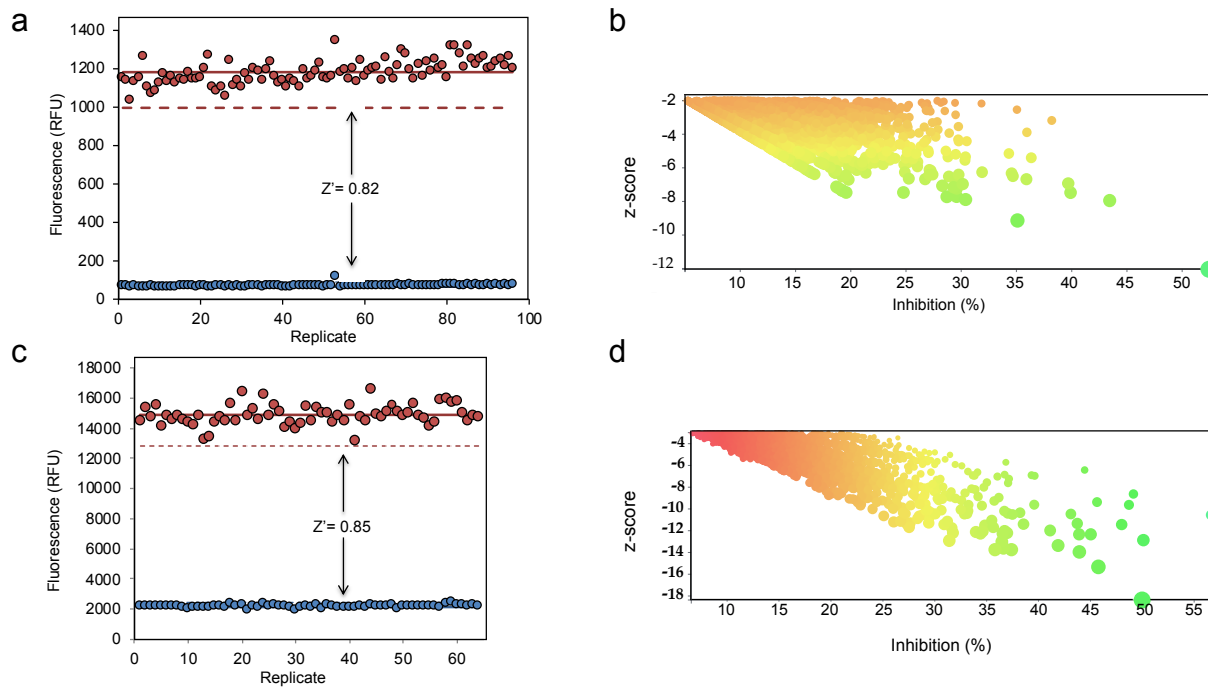

**Figure S5.** Large scale HTS for inhibitors of *SaOatA* $_{\Delta 445}$  and *NgPatB* $_{\Delta 100}$ . Determination of  $Z'$  values for the large scale HTS assays of (a) *SaOatA* $_{\Delta 445}$  and (c) *NgPatB* $_{\Delta 100}$  esterase activity. Results of the primary screens of (b) *SaOatA* $_{\Delta 445}$  and (d) *NgPatB* $_{\Delta 100}$  tested against separate libraries of over 60,000 compounds each. The heat maps serve to identify hits (green) which have both low z-scores and strong inhibition compared to in-plate controls.

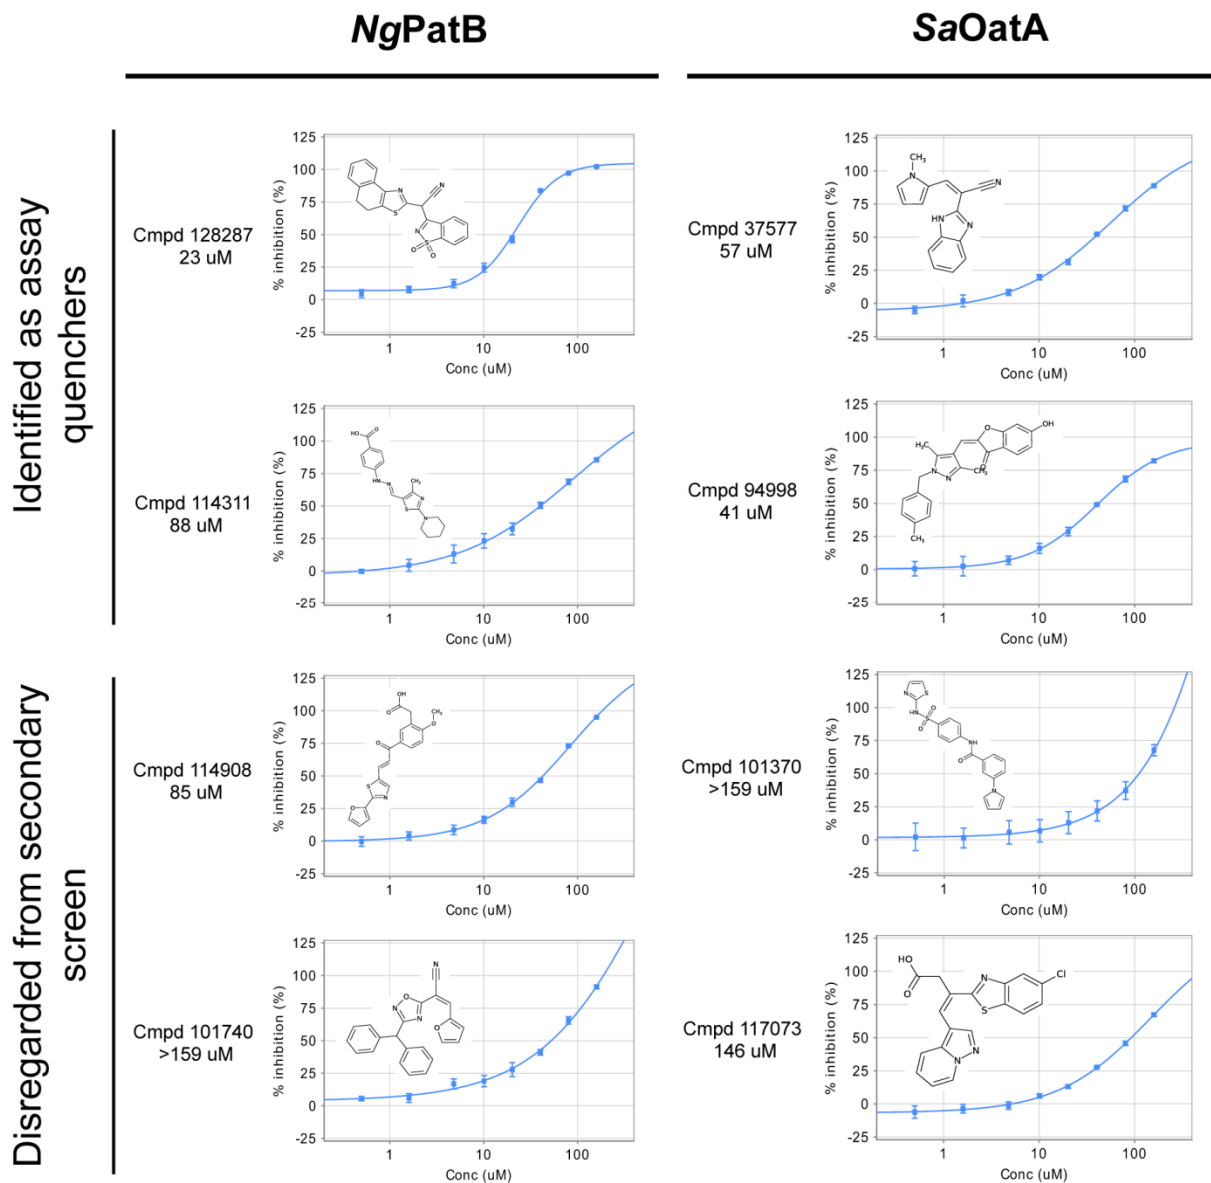

**Figure S6.** Representative dose response curves of *NgPatB* $_{\Delta 100}$  and *SaOatA* $_{\Delta 445}$  inhibition in the presence of select potential hit compounds from the respective large-scale screens that help to identify false-positives. 4MU-Ac was used as the substrate for these IC<sub>50</sub> determinations. The error bars denote standard deviation (n=3).

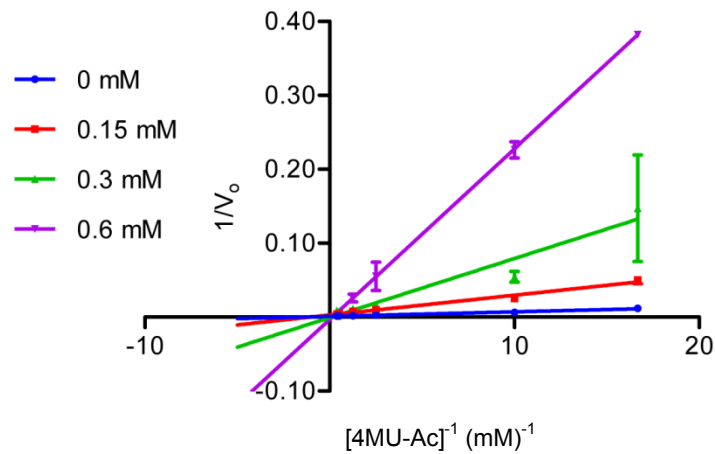

**Figure S7.** Mode of inhibition of NgPatB<sub>Δ69</sub> by esculetin. Double reciprocal plot of initial velocity *vs.* substrate concentration in the presence of esculetin at the concentrations indicated. Error bars denote standard deviation (n=3).

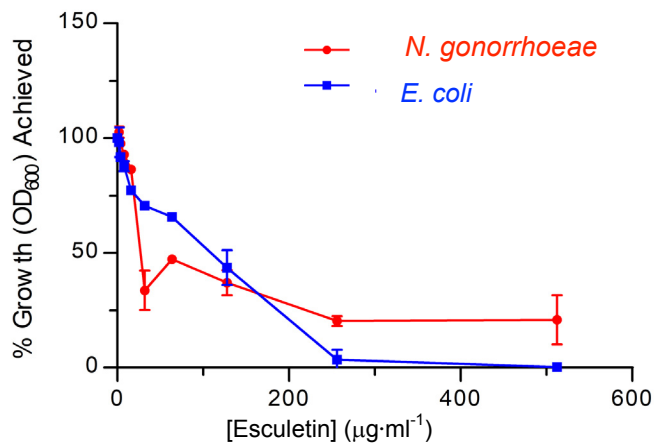

**Figure S8.** Effect of esculetin on bacterial cell growth. Cultures of *N. gonorrhoeae* and *E. coli* in their respective liquid growth media were incubated at 37 °C with esculetin at the concentrations indicated and cell growth was monitored at 600 nm until control cultures reached stationary phase. Growth (%) was normalized to solvent controls (0 μg·ml<sup>-1</sup> esculetin); solvent concentration was held constant at 5% (v/v). Error bars denote standard deviations (n=3).
